# Supplementary material for: The prevalence of turnover intention and influencing factors among emergency physicians: A national observation
Source: PubMed Central journal article supplement (PMC8818293; doi:10.7189/jogh.12..04005), 2022-02-05
Supplement: jogh-12-04005-s001.pdf [file jogh-12-04005-s001.pdf]

*Online Supplement Document*

**Table S1. The Multicollinearity test results**

| Variables                                                                                             | Tolerance | Variance inflation factor |
|-------------------------------------------------------------------------------------------------------|-----------|---------------------------|
| <b>Total</b>                                                                                          |           |                           |
| <i>Individual factors</i>                                                                             |           |                           |
| <b>Age</b>                                                                                            | 0.78      | 1.27                      |
| <b>Gender(Ref: Female)</b>                                                                            |           |                           |
| Male                                                                                                  | 0.92      | 1.08                      |
| <b>Marital status(Ref: Unmarried/widowed/divorced/separated)</b>                                      |           |                           |
| Married                                                                                               | 0.86      | 1.16                      |
| <b>Education level(Ref: Associated degree or less)</b>                                                |           |                           |
| Bachelor degree                                                                                       | 0.63      | 1.58                      |
| Master degree or higher                                                                               | 0.62      | 1.61                      |
| <b>Self-perceived physical health(Ref: Good)</b>                                                      |           |                           |
| Fair                                                                                                  | 0.39      | 2.55                      |
| Poor                                                                                                  | 0.30      | 3.30                      |
| <b>Geographical region(Ref: Eastern region)</b>                                                       |           |                           |
| Central region                                                                                        | 0.75      | 1.34                      |
| Western region                                                                                        | 0.75      | 1.33                      |
| <i>Work-related factors</i>                                                                           |           |                           |
| <b>Average monthly income(CNY) ((Ref: Less than or equal to 4000(US\$604.96))</b>                     |           |                           |
| 4001-6000(US\$605.11-US\$907.44)                                                                      | 0.74      | 1.35                      |
| 6001-8000(US\$907.59-US\$1209.92)                                                                     | 0.74      | 1.35                      |
| 8001 and above(US\$1210.07 and above)                                                                 | 0.75      | 1.33                      |
| <b>Self-perceived shortage of physicians(Ref: No)</b>                                                 |           |                           |
| yes                                                                                                   | 0.87      | 1.16                      |
| <b>The number of patients seen by the physicians (per day) (Ref: 0~10)</b>                            |           |                           |
| 11~20                                                                                                 | 0.81      | 1.23                      |
| 21~30                                                                                                 | 0.82      | 1.22                      |
| 31~40                                                                                                 | 0.87      | 1.15                      |
| ≥41                                                                                                   | 0.77      | 1.29                      |
| <b>The times for physicians to provide out-of-hospital resuscitation services (per week) (Ref: 0)</b> |           |                           |
| 1~10                                                                                                  | 0.31      | 3.22                      |
| 11~20                                                                                                 | 0.38      | 2.62                      |
| 21~30                                                                                                 | 0.51      | 1.97                      |
| ≥31                                                                                                   | 0.52      | 1.94                      |
| <b>Self-perceived medical errors(Ref: No)</b>                                                         |           |                           |
| yes                                                                                                   | 0.87      | 1.15                      |
| <b>Experienced verbal violence in the past year (Ref: No)</b>                                         |           |                           |
| yes                                                                                                   | 0.80      | 1.24                      |

|                                                                 |      |      |
|-----------------------------------------------------------------|------|------|
| <b>Experienced physical violence in the past year (Ref: No)</b> |      |      |
| yes                                                             | 0.84 | 1.19 |
| <i>Internal psychological factors</i>                           |      |      |
| <b>Positive affect</b>                                          | 0.57 | 1.76 |
| <b>Negative affect</b>                                          | 0.59 | 1.68 |
| <b>Depressive tendency</b>                                      | 0.45 | 2.22 |

**Table S2. The sensitivity analysis for the association between predictor variables and turnover intention**

| Variables                                                                                             | Turnover intention | P-value |
|-------------------------------------------------------------------------------------------------------|--------------------|---------|
| <b>Constant</b>                                                                                       |                    |         |
| <i>Individual factors</i>                                                                             |                    |         |
| <b>Age</b>                                                                                            | 1.01(1.00-1.02)    | 0.007   |
| <b>Gender (Ref: Female)</b>                                                                           |                    |         |
| Male                                                                                                  | 1.29(1.16-1.44)    | <0.001  |
| <i>Work-related factors</i>                                                                           |                    |         |
| <b>Average monthly income(CNY) ((Ref: Less than or equal to 4000(US\$604.96))</b>                     |                    |         |
| 4001-6000(US\$605.11-US\$907.44)                                                                      | 0.82(0.73-0.91)    | <0.001  |
| 6001-8000(US\$907.59-US\$1209.92)                                                                     | 0.75(0.66-0.85)    | <0.001  |
| 8001 and above(US\$1210.07 and above)                                                                 | 0.69(0.59-0.81)    | <0.001  |
| <b>Shortage of physicians(Ref: No)</b>                                                                |                    |         |
| Yes                                                                                                   | 0.65(0.58-0.73)    | <0.001  |
| <b>The times for physicians to provide out-of-hospital resuscitation services (per week) (Ref: 0)</b> |                    |         |
| 21~30                                                                                                 | 1.32(1.13-1.53)    | <0.001  |
| ≥31                                                                                                   | 1.25(1.07-1.44)    | 0.005   |
| <b>Self-perceived medical errors(Ref: No)</b>                                                         |                    |         |
| Yes                                                                                                   | 1.26(1.15-1.39)    | <0.001  |
| <b>Experienced verbal violence in the past year (Ref: No)</b>                                         |                    |         |
| Yes                                                                                                   | 1.17(1.02-1.34)    | 0.029   |
| <b>Experienced physical violence in the past year (Ref: No)</b>                                       |                    |         |
| Yes                                                                                                   | 1.35(1.21-1.50)    | <0.001  |
| <i>Internal psychological factors</i>                                                                 |                    |         |
| <b>Positive affect*</b>                                                                               | 0.94(0.93-0.96)    | <0.001  |
| <b>Negative affect*</b>                                                                               | 1.05(1.03-1.06)    | <0.001  |
| <b>Depressive tendency*</b>                                                                           | 1.11(1.10-1.12)    | <0.001  |

Exclude the participants within the lowest 10% in terms of response time.

\*Parameter estimates indicate the change in each metric associated with turnover intention. For instance, the physicians' turnover intention is associated with a 1.05-unit increase in negative affect.
